# Supplementary material for: Role of cobalt phthalocyanine on the formation of high-valent cobalt species revealed byin situRaman spectroscopy
Source: Royal Society of Chemistry journal article supplement (doi:10.1039/d2ta10063k), 2023-01-01
Supplement: d2ta10063k1.pdf [file d2ta10063k1.pdf]

## *Supporting Information*

### **Role of Cobalt Phthalocyanine on the Formation of High-Valent Cobalt Species Revealed by In situ Raman**

Jinzhi Jia<sup>a</sup>, Xiaohua Zhao<sup>a,b</sup>, Wenhui Hu<sup>c</sup>, Yantao Wang<sup>a</sup>, Junfeng Huang<sup>a</sup>, Jier Huang<sup>c</sup>, Hua Li<sup>a</sup>, Yong Peng<sup>a</sup>, Haiyan Ma<sup>a,\*</sup> and Cailing Xu<sup>a,\*</sup>

<sup>a</sup> State Key Laboratory of Applied Organic Chemistry, College of Chemistry and Chemical Engineering, College of Earth and Environmental Sciences, School of Materials and Energy, Lanzhou University, Lanzhou 730000, China.

<sup>b</sup> School of Chemical Engineering, Lanzhou University of Arts and Sciences, Lanzhou 730000, China.

<sup>c</sup> Department of Chemistry, Marquette University, Milwaukee, Wisconsin 53201, United States.

\*Corresponding author.

*E-mail address:* mahy06@lzu.edu.cn (H. Ma), xucl@lzu.edu.cn (C. Xu)

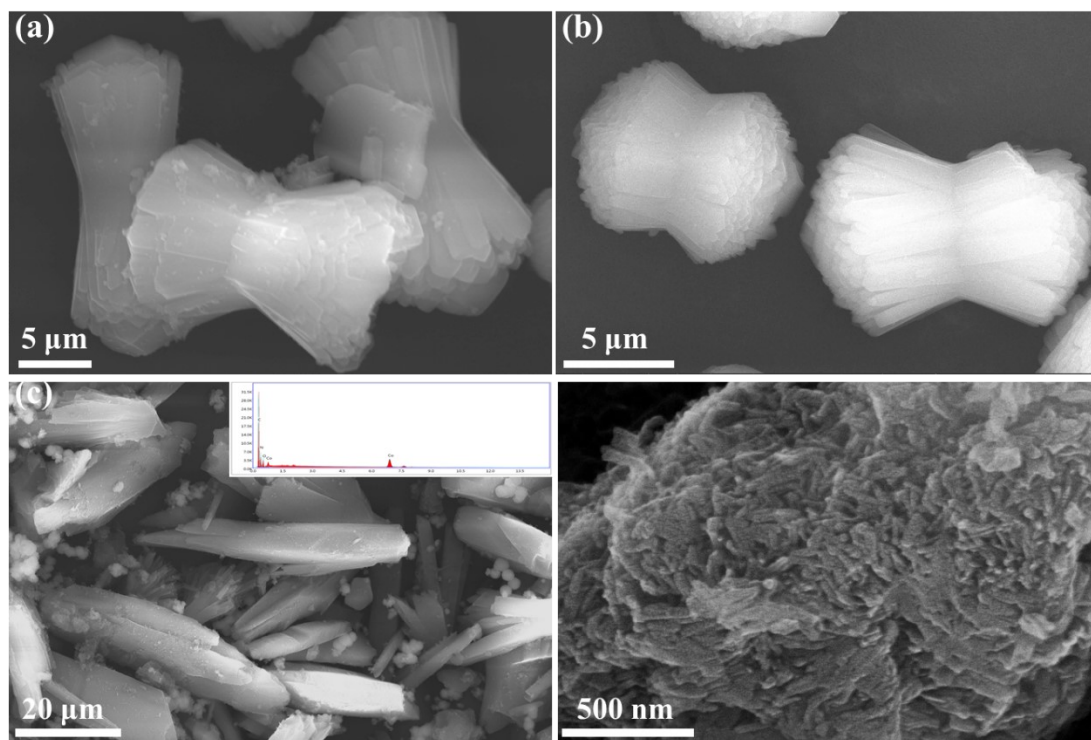

**Fig. S1** SEM images of Co-MOF-74 (a), Co-MOF-74@CoPc (b), CoPc (c) and Pc (d).

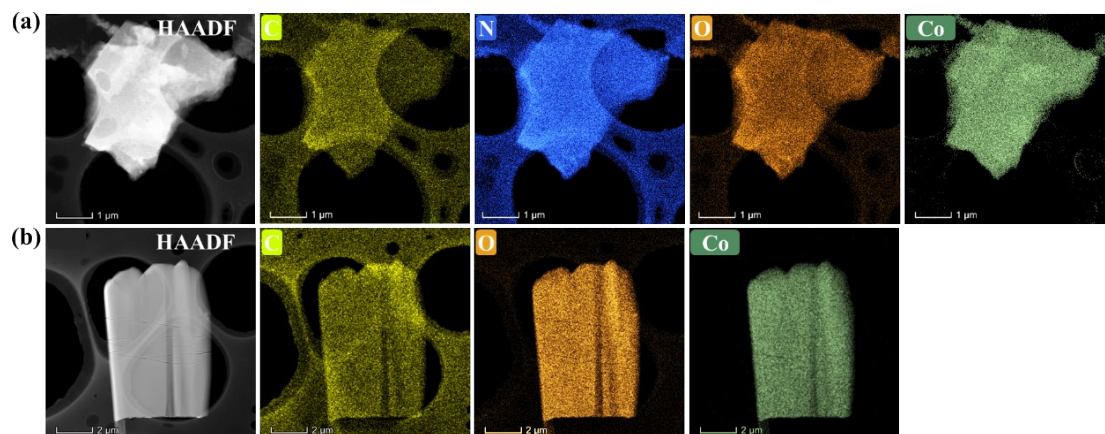

**Fig. S2** The HAADF-STEM images and the corresponding EDS elemental mapping images of Co-MOF-74@CoPc (a) and Co-MOF-74 (b).

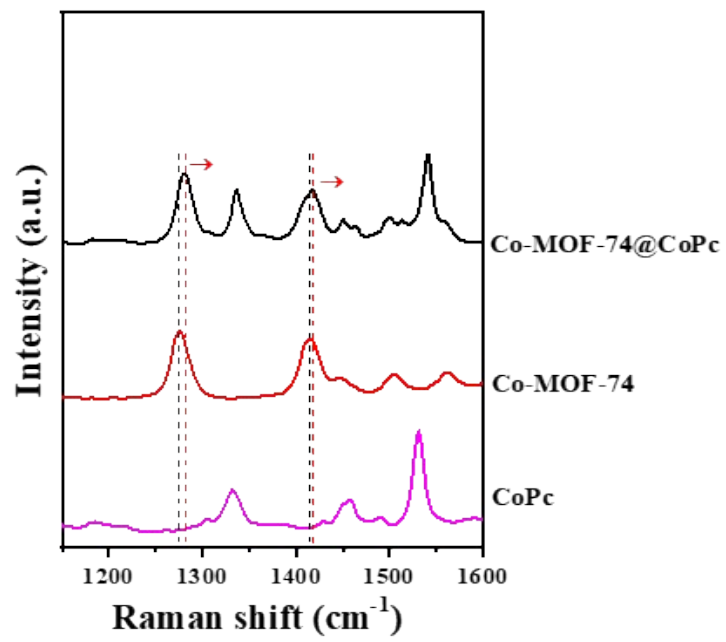

**Fig. S3** Raman spectra of CoPc, Co-MOF-74 and Co-MOF-74@CoPc.

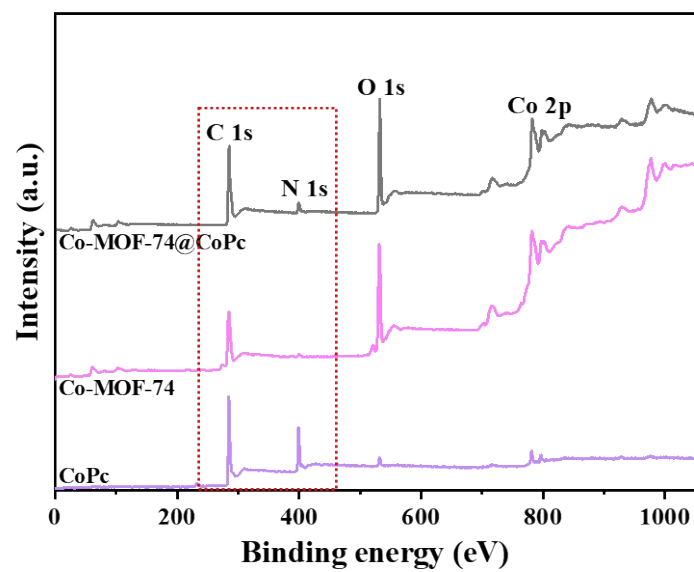

**Fig. S4** The XPS survey spectra of CoPc, Co-MOF-74 and Co-MOF-74@CoPc.

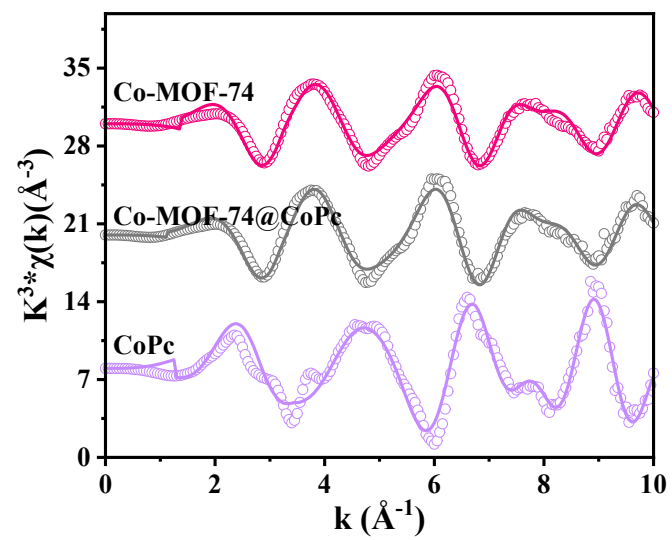

**Fig. S5** The Co K-edge extended EXAFS oscillation functions of CoPc, Co-MOF-74 and Co-MOF-74@CoPc.

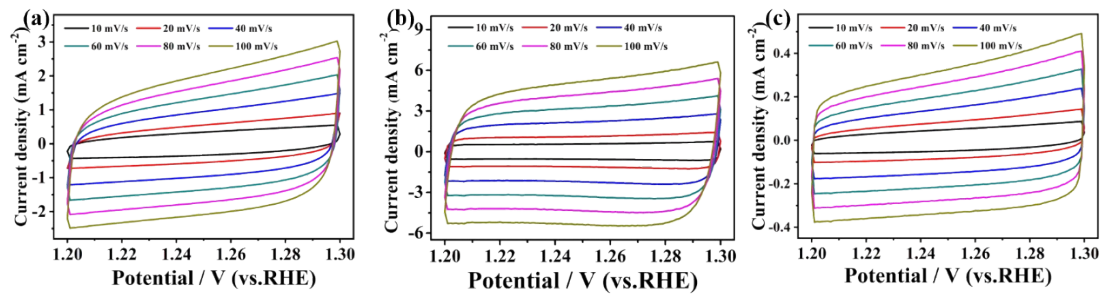

**Fig. S6** Cyclic voltammety curves of Co-MOF-74 (a), Co-MOF-74@CoPc (b) and CoPc (c) at different scanning rates from 10 - 100 mV s<sup>-1</sup> in 1 M KOH solution.

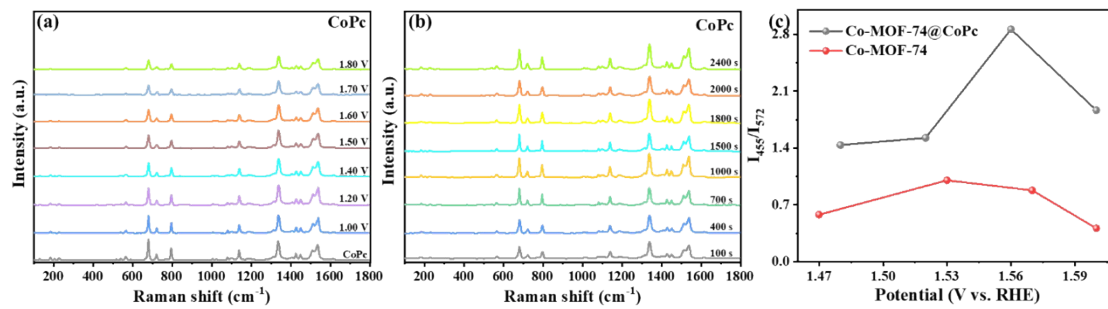

**Fig. S7** Potential-dependent (a) and time-dependent (b) in-situ Raman spectra of CoPc during OER process. (c) The evolution of  $I_{455}/I_{572}$  versus potential of Co-MOF-74 and Co-MOF-74@CoPc during OER process.



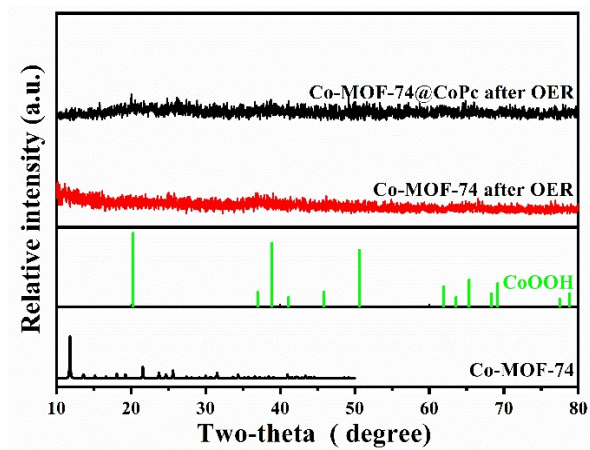

**Fig. S8** The XRD patterns of Co-MOF-74 and Co-MOF-74@CoPc after the OER stability.

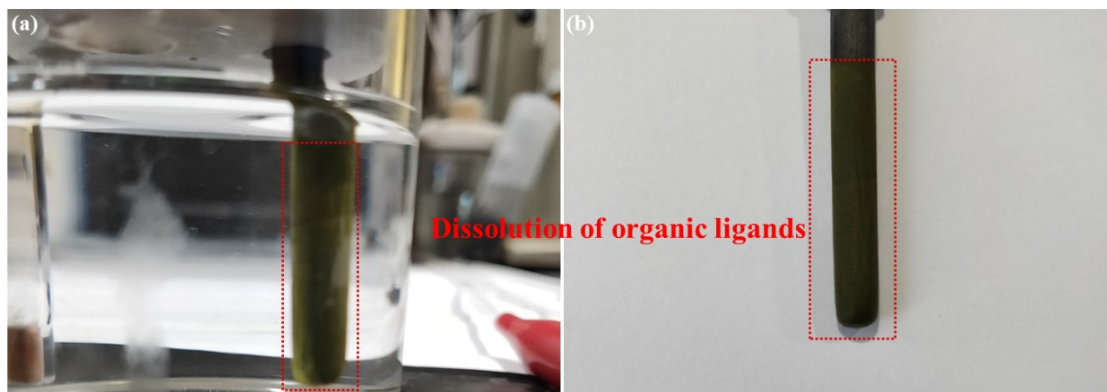

**Fig. S9** (a, b) Optical microscopy images of the reference electrode after the OER stability.

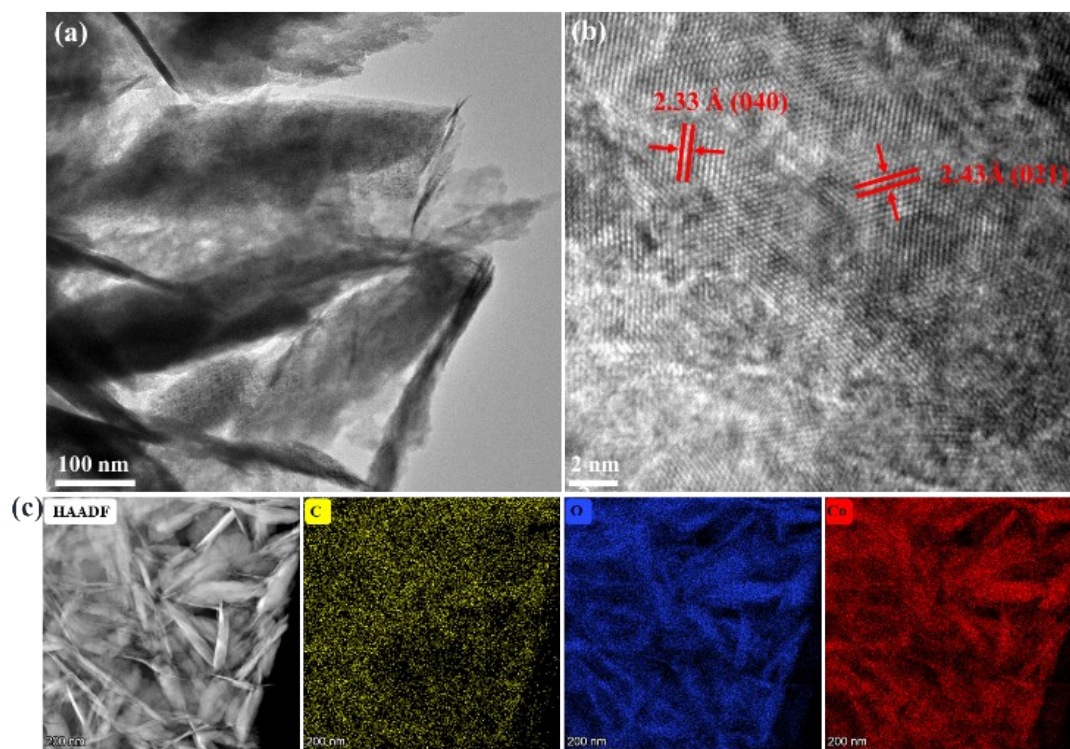

**Fig. S10** (a) TEM image, (b) HRTEM image, (c) HAADF-STEM image and corresponding EDS elemental mapping images of the Co-MOF-74 after the OER stability.

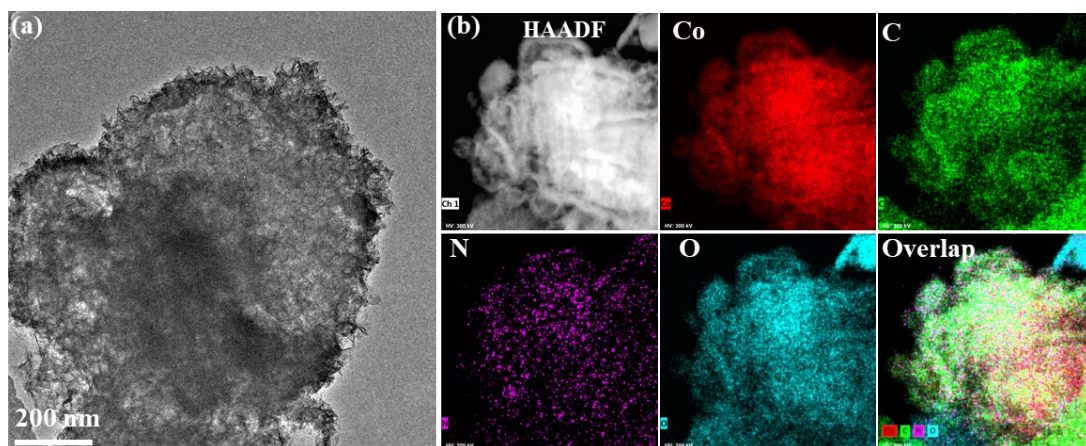

**Fig. S11** (a) TEM image, (b) HAADF-STEM image and corresponding EDS elemental mapping images of the Co-MOF-74@CoPc after the OER stability.

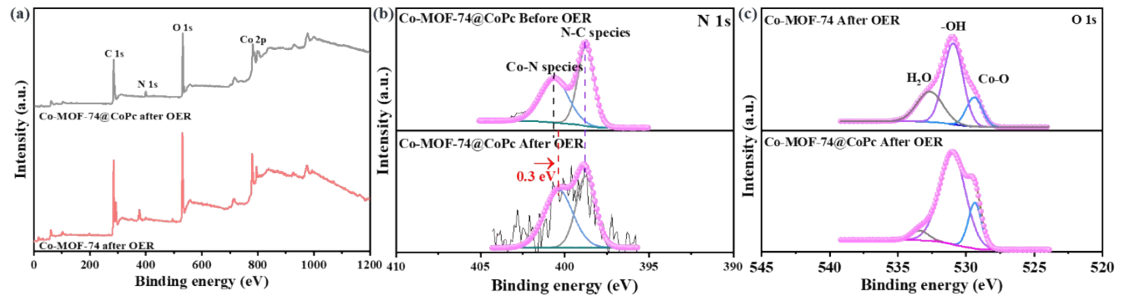

**Fig. S12** Survey XPS spectra (a) and High-resolution O 1s XPS spectra (c) of the Co-MOF-74, Co-MOF-74@CoPc after the OER stability. (b) High-resolution N 1s XPS spectra of Co-MOF-74@CoPc and Co-MOF-74/CoPc after the OER stability.

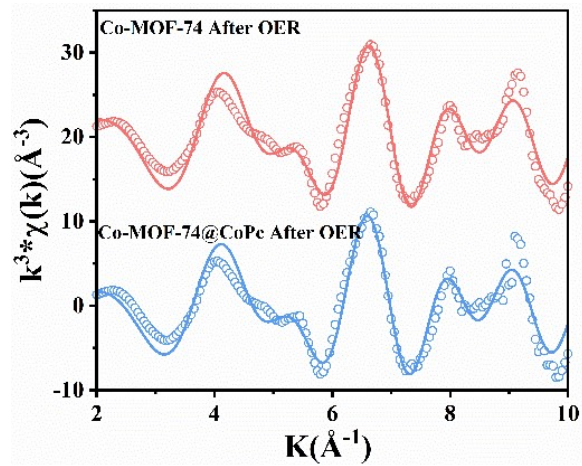

**Fig. S13** (a) The Co K-edge extended EXAFS oscillation functions of Co-MOF-74 and Co-MOF-74@CoPc after the OER stability. The experimental spectra are represented by scatter points, and the theoretical fits are represented by the solid line.

**Table S1.** EXAFS Fitting parameters of Co R-space for Co-MOF-74 and Co-MOF-74@CoPc, respectively.

| <b>Samples</b> | <b>Path</b>       | <b>CN</b> | <b>S<sub>0</sub><sup>2</sup></b> | <b>ΔE<sub>0</sub> (eV)</b> | <b>σ<sup>2</sup> (Å<sup>2</sup>)</b> | <b>R (Å)</b> |
|----------------|-------------------|-----------|----------------------------------|----------------------------|--------------------------------------|--------------|
| Co-MOF-74      | Co-O <sub>1</sub> | 3         | 0.87                             | 7.0                        | 0.002                                | 2.06         |
|                | Co-O <sub>2</sub> | 3         |                                  |                            | 0.0095                               | 2.24         |
|                | Co-C              | 3         |                                  |                            | 0.010                                | 3.20         |
|                | Co-Co             | 2         |                                  |                            | 0.010                                | 3.06         |
| Co-MOF-74@CoPc | Co-O <sub>1</sub> | 3         | 0.85                             | 4.7                        | 0.0025                               | 2.05         |
|                | Co-O <sub>2</sub> | 3         |                                  |                            | 0.010                                | 2.18         |
|                | Co-C              | 3         |                                  |                            | 0.010                                | 3.11         |
|                | Co-Co             | 2         |                                  |                            | 0.010                                | 3.06         |

**Table S2.** EXAFS Fitting parameters of Co R-space for Co-MOF-74 and Co-MOF-74@CoPc after the OER stability, respectively.

| Samples        | Path              | CN | $S_0^2$ | $\Delta E_0$ (eV) | $\sigma^2$ ( $\text{\AA}^2$ ) | R ( $\text{\AA}$ ) |
|----------------|-------------------|----|---------|-------------------|-------------------------------|--------------------|
| Co-MOF-74      | Co-O <sub>1</sub> | 6  | 0.95    | -3.3              | 0.0077                        | 1.91               |
|                | Co-Co             | 6  |         |                   | 0.0096                        | 2.85               |
| Co-MOF-74@CoPc | Co-O <sub>1</sub> | 6  | 0.95    | -5.1              | 0.0076                        | 1.91               |
|                | Co-Co             | 6  |         |                   | 0.0097                        | 2.85               |

CN: coordination numbers;

$S_0^2$ : amplitude reduction factor, ( $0.7 < S_0^2 < 1.0$ );

$\sigma^2$ : Debye-Waller factors, ( $\sigma^2 < 0.02$ );

$\Delta E_0$ : the inner potential correction, ( $-10 < \Delta E_0 < 10$ );

R: bond length, all the path distances discussed are apparent distances without phase correction.



**Table S3.** Comparison of OER catalytic activity of Co-MOF-74 and Co-MOF-74@CoPc with M-MOF-74 and Pc based catalysts in alkaline media.

| Samples                                     | Test      | Overpotential<br>(mV@mA cm <sup>-2</sup> ) | Tafel slope<br>(mV dec <sup>-1</sup> ) | Durability<br>(h) | Substrate | References |
|---------------------------------------------|-----------|--------------------------------------------|----------------------------------------|-------------------|-----------|------------|
|                                             | Condition |                                            |                                        |                   |           |            |
| Co-MOF-74@CoPc                              | 1.0 M KOH | 291@10                                     | 69                                     | 220               | GC        | This work  |
| Co-MOF-74                                   | 1.0 M KOH | 351@10                                     | 73                                     | 58                | GC        | This work  |
| Fe(OH) <sub>3</sub> @Co-MOF-74              | 1.0 M KOH | 292@10                                     | 44                                     | 20                | CP        | 1          |
| Co-MOF-74                                   | 1.0 M KOH | 389@10                                     | 80                                     | 20                | CP        | 1          |
| FeCo-MNS-1.0                                | 0.1 M KOH | 298@10                                     | 21.6                                   | 10000 s           | GC        | 2          |
| Co <sub>0.6</sub> Fe <sub>0.4</sub> -MOF-74 | 1.0 M KOH | 280@10                                     | 56                                     | 12                | GC        | 3          |
| CoFe-MOF-74/Co/CC                           | 1.0 M KOH | 226@20                                     | 85.1                                   | 70                | CC        | 4          |
| Fe-MOF-74@NF                                | 1.0 M KOH | 207@10                                     | 41.1                                   | 72                | NF        | 5          |
| NiFe-MOF-74/NF                              | 1.0 M KOH | 223@10                                     | 71.6                                   | 65                | NF        | 6          |
| Co <sub>3</sub> O <sub>4</sub> @MOF-74      | 1.0 M KOH | 285@50                                     | 43                                     | 12                | NF        | 7          |
| NiCoFe-MOF-74                               | 1.0 M KOH | 270@10                                     | 89                                     | 8                 | GC        | 8          |
| FeCo <sub>2</sub> Ni-MOF-74                 | 1.0 M KOH | 269@10                                     | 8.0                                    | 100               | GC        | 9          |
| NiPc-GO                                     | 1.0 M KOH | 320@10                                     | 61                                     | 17                | GC        | 10         |
| FeCo-PPC                                    | 1.0 M KOH | 254@10                                     | 42.86                                  | 24                | NF        | 11         |
| NiPc-NiFe <sub>0.09</sub>                   | 1.0 M KOH | 300@10                                     | 55                                     | 1000 cycles       | GC        | 12         |
| pCoPc-1/CC                                  | 1.0 M KOH | 382@10                                     | 102.9                                  | 12                | CC        | 13         |
| NiPc-MOF                                    | 1.0 M KOH | onset potential                            | 74                                     | 50                | FTO       | 14         |

250

CP: Carbon Paper

GC: Glassy Carbon

NF: Nickel Foam

## References :

- 1 L. Zhuang, L. Ge, H. Liu, Z. Jiang, Jia, Y.; Z. Li, D. Yang, R. Hocking, M. Li, L. Zhang, X. Wang, X. Yao, Z. Zhu, *Angew. Chem. Int. Ed.*, 2019, **58**, 13565-13572.
- 2 X. Zhao, B. Pattengale, D. Fan, Z. Zou, Y. Zhao, J. Du, J. Huang, C. Xu, *ACS Energy Lett.*, 2018, **3**, 2520-2526.
- 3 Z. Gao, Z. Yu, F. Liu, C. Yang, Y. Yuan, Y. Yu, F. Luo, *ChemSusChem*, 2019, **12**, 4623-4628.
- 4 Q. Zha, M. Li, Z. Liu, Y. Ni, *ACS Sustain. Chem. Eng.*, 2020, **8**, 12025-12035.
- 5 Q. Wang, F. Wei, D. Manoj, Z. Zhang, J. Xiao, X. Zhao, F. Xiao, H. Wang, S. Wang, *Chem. Commun.*, 2019, **55**, 11307-11310.
- 6 J. Xing, K. Guo, Z. Zou, M. Cai, J. Du, C. Xu, *Chem. Commun.*, 2018, **54**, 7046-7049.
- 7 W. Gao, W. Gou, R. Wei, X. Bu, Y. Ma, J. Ho, *Appl. Mater. Today*, 2020, **21**, 100820.
- 8 X. Wang, H. Xiao, A. Li, Z. Li, S. Liu, Q. Zhang, Y. Gong, L. Zheng, Y. Zhu, C. Chen, D. Wang, Q. Peng, L. Gu, X. Han, J. Li, Y. Li, *J. Am. Chem. Soc.*, 2018, **140**, 15336-15341.
- 9 X. Mu, H. Yuan,; H. Jing, F. Xia, J. Wu, X. Gu, C. Chen, J. Bao, S. Liu, S. Mu, *Applied Catalysis B: Environmental* 2021, **296**, 120095.
- 10 W. Wan, C. Triana, J. Lan, J. Li, C. Allen, Y. Zhao, M. Iannuzzi, and G. Patzke, *ACS Nano* 2020, **14**, 13279–13293.
- 11 Q. Qi, J. Hu, S. Guo, H. Song, S. Wang, Y. Yao, T. Le, W. Li, C. Zhang, L. Zhang, *Applied Catalysis B: Environmental*, 2021, **299**, 120637.
- 12 J. Li, P. Liu, J. Mao, J. Yan and W. Song, *J. Mater. Chem. A*, 2021, **9**, 11248-11254.
- 13 Y. Kim, D. Kim, J. Lee, L. Lee, and D. Ng, *Adv. Funct. Mater.*, 2021, 2103290
- 14 H. Jia, Y. Yao, J. Zhao, Y. Gao, Z. Luo and P. Du, *J. Mater. Chem. A*, 2018, **6**, 1188–1195.
